# Supplementary material for: Selective homocysteine turn-on fluorescent probes and their bioimaging applications
Source: Royal Society of Chemistry journal article supplement (doi:10.1039/c4cc00243a), 2014-01-01
Supplement: c4cc00243a1.pdf [file c4cc00243a1.pdf]

## Supporting Information for “Selective Turn-on Fluorescent Probes for Homocysteine and Their Bioimaging Applications”

Hye Yeon Lee,<sup>a</sup> Yoon Pyo Choi,<sup>b</sup> Sunkyung Kim,<sup>c</sup> Taejin Yoon,<sup>b</sup> Zhiqian Guo,<sup>a,d</sup> Songyi Lee,<sup>a</sup> K. M. K. Swamy,<sup>a,e</sup> Gyoungmi Kim,<sup>a</sup> Jin Yong Lee,<sup>\*c</sup> Injae Shin<sup>\*b</sup>  
and Juyoung Yoon<sup>\*a</sup>

<sup>a</sup> Department of Chemistry and Nano Science, Ewha Womans University, Seoul 120-750, Korea; <sup>b</sup> Department of Chemistry, National Creative Research Center for Biofunctional Molecules, Yonsei University, Seoul 120-749, Korea; <sup>c</sup> Department of Chemistry, Sungkyunkwan University, Suwon 440-746, Korea; <sup>d</sup> Key Laboratory for Advanced Materials and Institute of Fine Chemicals, East China University of Science & Technology, Shanghai 200237, P. R. China; <sup>e</sup> Department of Pharmaceutical Chemistry, V. L. College of Pharmacy, Raichur-584 103, India  
*jyoon@ewha.ac.kr; injae@yonsei.ac.kr; jinylee@skku.edu*

|                                                                                                                                                                                                                               |          |
|-------------------------------------------------------------------------------------------------------------------------------------------------------------------------------------------------------------------------------|----------|
| Experimental Section.....                                                                                                                                                                                                     | S3 page  |
| Fig S1 <sup>1</sup> H NMR (DMSO- <i>d</i> <sub>6</sub> , 300 MHz) spectrum of <b>P-Hcy-1</b> .....                                                                                                                            | S5 page  |
| Fig S2 <sup>13</sup> C NMR (DMSO- <i>d</i> <sub>6</sub> , 500 MHz) spectrum of <b>P-Hcy-1</b> .....                                                                                                                           | S5 page  |
| Fig S3 The FAB mass spectrum of <b>P-Hcy-1</b> .....                                                                                                                                                                          | S6 page  |
| Fig S4 <sup>1</sup> H NMR (DMSO- <i>d</i> <sub>6</sub> , 300 MHz) spectrum of <b>P-Hcy-2</b> .....                                                                                                                            | S6 page  |
| Fig S5 <sup>13</sup> C NMR (DMSO- <i>d</i> <sub>6</sub> , 300 MHz) spectrum of <b>P-Hcy-2</b> .....                                                                                                                           | S7 page  |
| Fig S6 The FAB mass spectrum of <b>P-Hcy-2</b> .....                                                                                                                                                                          | S7 page  |
| Table S1. Detection limits, dissociation constants and response times of reported Hcy probes, <b>P-Hcy-1</b> and <b>P-Hcy-2</b> . ....                                                                                        | S8 page  |
| Fig S7. Selective response of <b>P-Hcy-1</b> to Hcy.....                                                                                                                                                                      | S9 page  |
| Fig S8 Normalized fluorescence responses of <b>P-Hcy-1</b> (1 μM) to changing Hcy concentrations in DMSO-HEPES (0.01M, pH 7.4) (1:9, v/v). (Detection limit = 1.94 × 10 <sup>-6</sup> M).....                                 | S10 page |
| Fig S9 (a) Possible mechanism for the reaction between <b>P-Hcy-1</b> and Hcy. (b) <sup>1</sup> H NMR spectral change of <b>P-Hcy-1</b> upon addition of Hcy in DMSO- <i>d</i> <sub>6</sub> :D <sub>2</sub> O (9:1, v/v)..... | S10 page |
| Fig S10. The FAB mass spectrum of <b>P-Hcy-1</b> +Hcy.....                                                                                                                                                                    | S11 page |

|                                                                                                                                                                                                                                                                                                                                                                                                                              |          |
|------------------------------------------------------------------------------------------------------------------------------------------------------------------------------------------------------------------------------------------------------------------------------------------------------------------------------------------------------------------------------------------------------------------------------|----------|
| Fig S11 Optimized structures of <b>P-Hcy-1</b> , <b>P-Hcy-1+Hcy</b> and <b>P-Hcy-1+Cys</b> .....                                                                                                                                                                                                                                                                                                                             | S11 page |
| Fig S12 Molecular orbitals and excitation contributions of the excitation for (a) <b>P-Hcy-1</b> +Hcy and (b) <b>P-Hcy-1+Cys</b> .....                                                                                                                                                                                                                                                                                       | S12 page |
| Fig S13 Selective response of <b>P-Hcy-2</b> to Hcy.....                                                                                                                                                                                                                                                                                                                                                                     | S14 page |
| Fig S14 Fluorescence changes of <b>P-Hcy-2</b> (10 $\mu$ M) with Hcy in DMSO-HEPES (0.01 M, pH 7.4) (1:9, v/v). (Excitation wavelength: 376 nm) (Slit: 3 $\times$ 5 nm).....                                                                                                                                                                                                                                                 | S15 page |
| Fig S15 (a) Time-dependent change of <b>P-Hcy-2</b> (10 $\mu$ M) with the addition of 10 equiv. of Hcy in DMSO-HEPES (0.01M, pH 7.4) (1:9, v/v). (Excitation wavelength: 376 nm) (Slit: 3 $\times$ 5 nm). (b) Time-dependent change of <b>P-Hcy-2</b> (10 $\mu$ M) with the addition of 10 equiv. of Hcy, Cys and GSH in DMSO-HEPES (0.01M, pH 7.4) (1:9, v/v). (Excitation wavelength: 376 nm) (Slit: 3 $\times$ 5 nm)..... | S16 page |
| Fig S16 Normalized fluorescence responses of <b>P-Hcy-2</b> (0.1 $\mu$ M) to changing Hcy concentrations in DMSO-HEPES (0.01M, pH 7.4) (1:9, v/v). (Detection limit = 1.44 $\times$ 10 <sup>-7</sup> M).....                                                                                                                                                                                                                 | S17 page |
| Fig S17 <sup>1</sup> H NMR spectral change of <b>P-Hcy-2</b> upon addition of Hcy in DMSO- <i>d</i> <sub>6</sub> :D <sub>2</sub> O (9:1, v/v).....                                                                                                                                                                                                                                                                           | S17 page |
| Fig S18 Fluorescence detection of Hcy in HeLa cells using (A) <b>P-Hcy-1</b> and (B) <b>P-Hcy-2</b> . .....                                                                                                                                                                                                                                                                                                                  | S18 page |

## Experimental Section

**General Methods.** Unless otherwise noted, materials were obtained from Aldrich and were used without further purification. Melting points were measured using a Büchi 530 melting point apparatus. <sup>1</sup>H NMR and <sup>13</sup>C NMR spectra were recorded using Bruker 300 MHz or Varian 500 MHz. Chemical shifts are given in ppm and coupling constants (J) in Hz. UV absorption spectra were obtained on UVIKON 933 Double Beam UV/VIS Spectrophotometer. Fluorescence emission spectra were obtained using RF-5301/PC Spectrofluorophotometer (Shimadzu)

**Synthesis of P-Hcy-1.** A solution of 1-Hydroxypyrene-2-carbaldehyde (50 mg, 0.2 mmol) in 10 mL of dichloroethane containing anhydrous K<sub>2</sub>CO<sub>3</sub> (0.11 g, 0.8 mmol) was stirred at room temperature for 10 min. Propionyl chloride (0.028 g, 0.3 mmol) was then added dropwise using a syringe. The mixture was stirred at reflux 1 h to complete the reaction. The mixture was filtered and the filtrate was concentrated in vacuo giving a residue that was subjected to column chromatography (silica) using CH<sub>2</sub>Cl<sub>2</sub> as eluent to give pure **P-Hcy-1** (0.058 g, 94%); mp 142°C (dec.); <sup>1</sup>H NMR (300 MHz, DMSO-*d*<sub>6</sub>) δ 1.31 (t, J = 7.5 Hz, 3H), 3.05 (q, J = 7.5 Hz, 2H), 8.19-8.44 (m, 7H), 8.83 (s, 1H), 10.47 (s, 1H); <sup>13</sup>C NMR (125 MHz, DMSO-*d*<sub>6</sub>) δ 191.53, 174.14, 144.84, 132.09, 131.97, 130.02, 129.30, 128.97, 128.89, 128.22, 128.12, 127.56, 127.08, 126.83, 125.86, 124.49, 123.88, 121.36, 27.48, 9.51; FAB-MS m/z = 303.1021 [M+H]<sup>+</sup>, calcd for C<sub>20</sub>H<sub>14</sub>O<sub>3</sub> = 302.0943.

**Synthesis of P-Hcy-2.** To a solution of 1-hydroxypyrene-2-carbaldehyde (0.2 g, 0.82 mmol) and dry triethylamine (1.2 mL, 8.2 mmol) in dry CH<sub>2</sub>Cl<sub>2</sub> (20 mL) under nitrogen at 0°C was added acryloyl chloride (0.66 mL, 8.2 mmol) dropwise. The mixture was stirred for 4 h at room temperature and concentrated in vacuo. The residue was subjected to silica gel column chromatography using hexane/CH<sub>2</sub>Cl<sub>2</sub> (v/v 8:2) as eluent to obtain yellow powder of **P-Hcy-2** (0.054 g, 22%); mp 138°C (dec.); <sup>1</sup>H NMR (300 MHz, DMSO-*d*<sub>6</sub>) δ 6.35 (dd, J = 9.0 and 6.0 Hz, 1H), 6.71-6.75 (m, 2H), 8.14-8.24 (m, 2H), 8.28-8.44 (m, 5H), 8.84 (s, 1H), 10.40 (s, 1H); <sup>13</sup>C NMR (125 MHz, DMSO-*d*<sub>6</sub>) δ 190.96, 165.29, 143.87, 135.27, 131.80, 131.63, 129.99, 129.17, 128.76, 128.72, 127.90, 127.78, 127.64, 1

27.52, 126.95, 126.65, 125.49, 124.06, 123.56, 120.69; FAB-MS  $m/z = 300.0786$  [M+H]<sup>+</sup>, calcd for C<sub>20</sub>H<sub>12</sub>O<sub>3</sub> = 300.0786.

**Fluorescence Studies.** Stock solutions (0.01 M) of Hcy, Cys and GSH were prepared in distilled water. Stock solutions of the probes (1 mM) were also prepared in DMSO. Test solutions were prepared by placing 30  $\mu$ L of the probe stock solution into a test tube, diluting the solution to 3 mL with HEPES buffer (0.01M, pH 7.4), and adding an appropriate aliquot of each substrate containing stock solution. For all measurements, the excitation wavelength was 350 nm for **P-Hcy-1** and 376 nm for **P-Hcy-2**. Fluorescence Spectra were measured 10 min after addition of **P-Hcy-1** and **P-Hcy-2**.

**Fluorescence detection of intracellular Hcy using Hcy probe.** HeLa cells were cultured in Dulbecco's modified Eagle's medium (DMEM, Invitrogen), supplemented with 10% (v/v) fetal bovine serum (Gibco), 100 units/mL penicillin (Gibco) and 100  $\mu$ g/mL streptomycin (Gibco) in a humidified incubator with 5% CO<sub>2</sub> at 37 °C. The cells were stained with 60  $\mu$ M Hcy probe (**P-Hcy-1** or **P-Hcy-2**) for 20 min to detect intracellular Hcy. On the other hand, HeLa cells were incubated with 20  $\mu$ M Hcy for 30 min, washed with PBS to remove excess Hcy, and then stained with 60  $\mu$ M Hcy probe for 20 min. In addition, Hcy-treated cells were incubated with 500  $\mu$ M NEM for 20 min and stained with 60  $\mu$ M Hcy probe for 20 min after washing with PBS. The stained cells were imaged using confocal microscopy (LSM 510 META, Carl Zeiss) (Hcy probes;  $\lambda_{ex} = 405$  nm,  $\lambda_{em} = 420 - 480$  nm). To test whether Hcy probes detect intracellular Cys, HeLa cells were pre-treated with 500  $\mu$ M NEM for 20 min to remove the endogenous thiol containing molecules. After washing with PBS, the cells were further incubated with 20  $\mu$ M Cys for 20 min and stained with either 60  $\mu$ M Hcy probe or 20  $\mu$ M Cys probe for 20 min. The treated cells were analyzed by confocal microscopy (Cys probe;  $\lambda_{ex} = 633$  nm,  $\lambda_{em} = 650$  nm). To test whether Hcy probe detects intracellular GSH, HeLa cells were incubated with 250  $\mu$ M  $\alpha$ -lipoic acid for 48 h to induce generation of GSH in cells. After washing with PBS, the cells were treated with either 60  $\mu$ M Hcy probe or 20  $\mu$ M thiol probe. The treated cells were analyzed by confocal microscopy (thiol probe;  $\lambda_{ex} = 488$  nm,  $\lambda_{em} = 505 - 530$  nm).

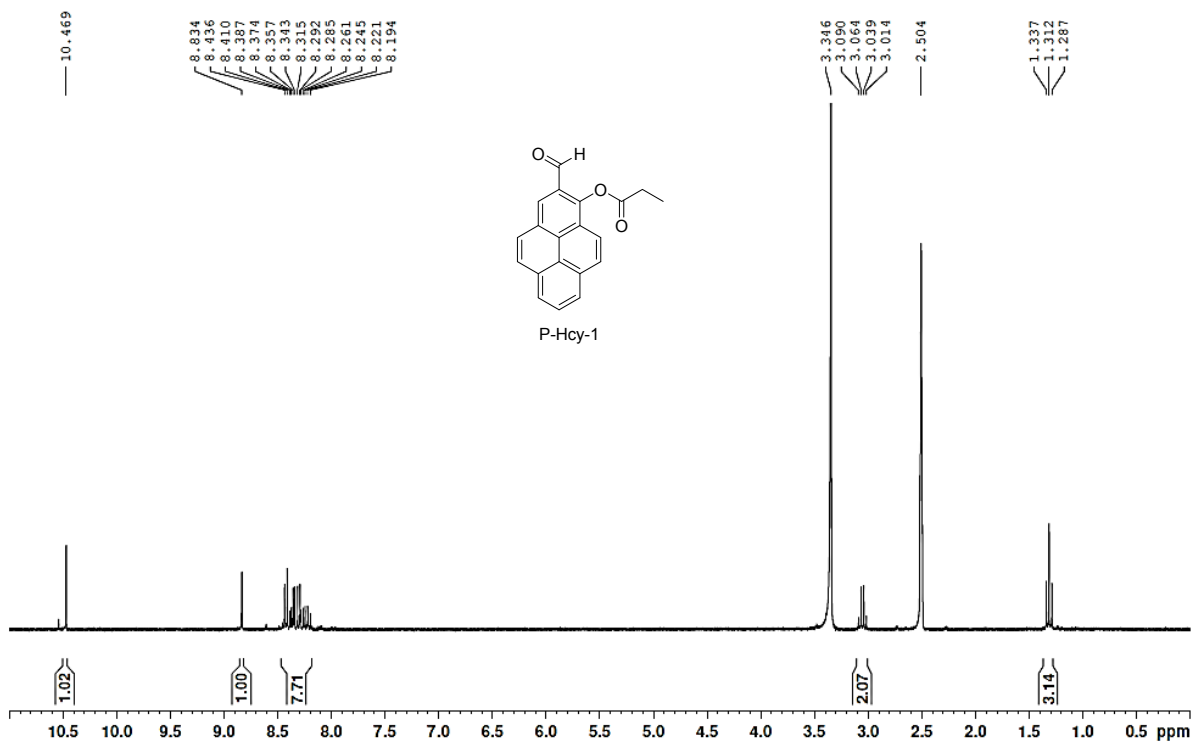

**Fig S1.** <sup>1</sup>H NMR (DMSO-*d*<sub>6</sub>, 300 MHz) spectrum of P-Hcy-1.

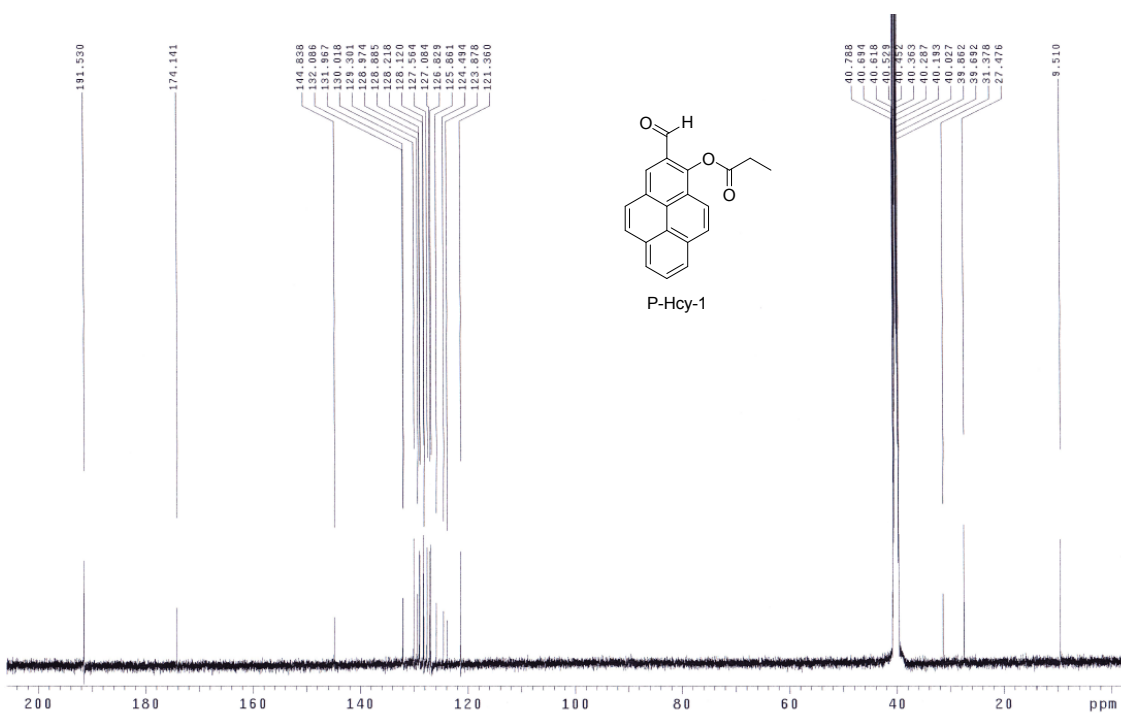

**Fig S2.** <sup>13</sup>C NMR (DMSO-*d*<sub>6</sub>, 125 MHz) spectrum of P-Hcy-1.

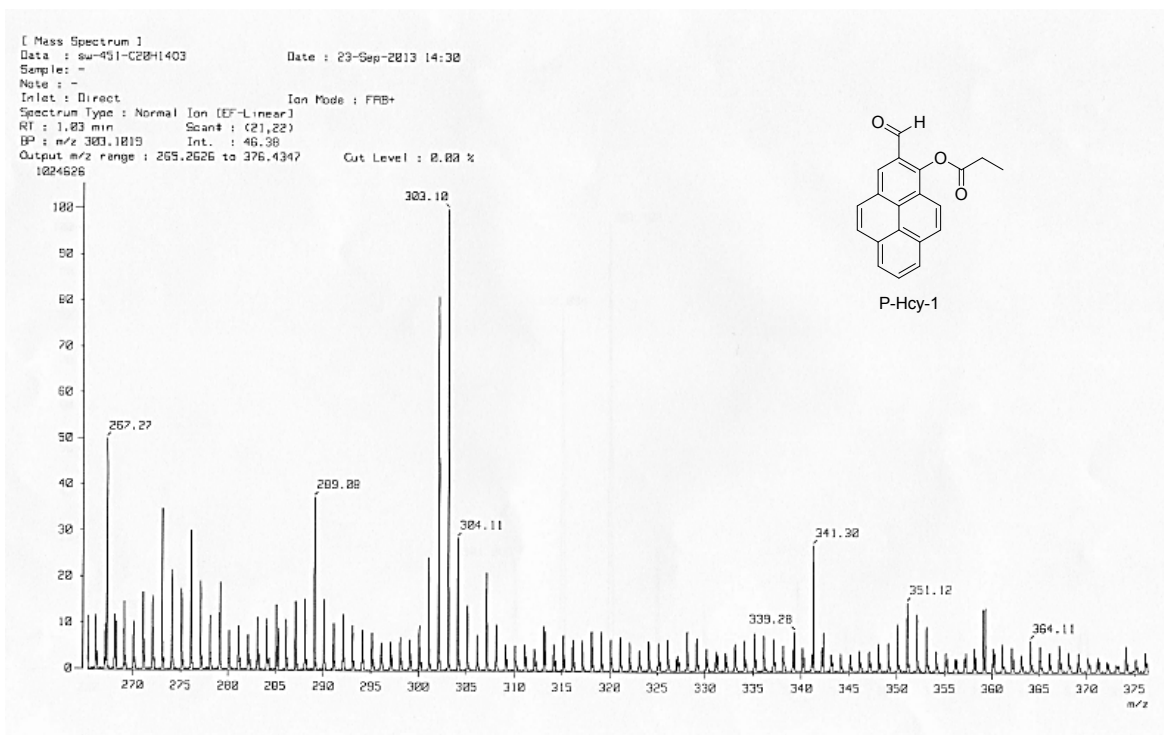

Fig S3. The FAB mass spectrum of P-Hcy-1.

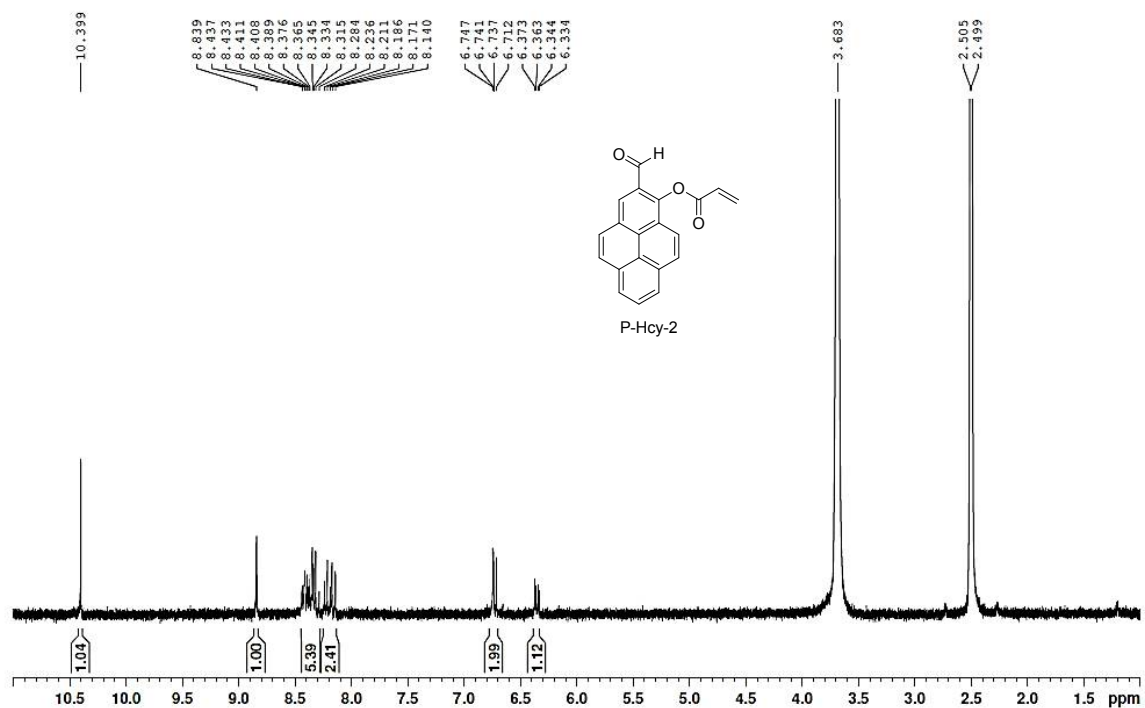

Fig S4.  $^1\text{H}$  NMR (DMSO- $d_6$ , 300 MHz) spectrum of P-Hcy-2.

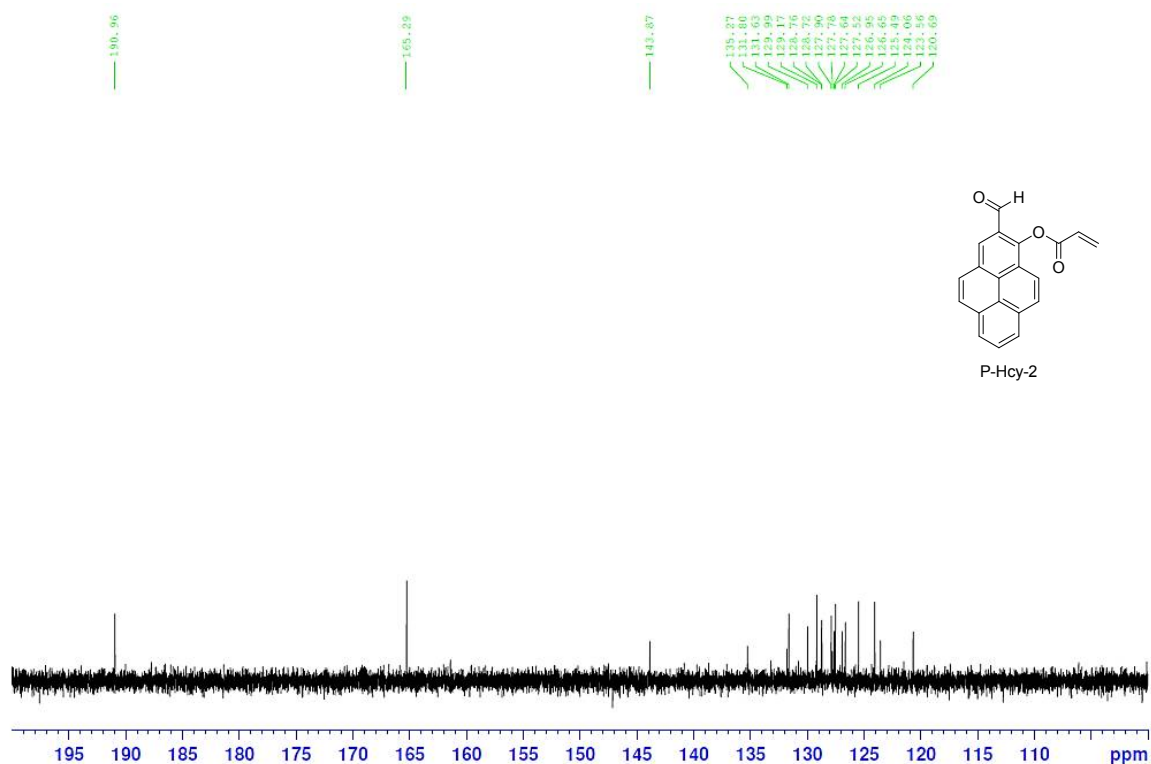

**Fig S5.**  $^{13}\text{C}$  NMR (DMSO- $d_6$ , 125 MHz) spectrum of **P-Hcy-2**.

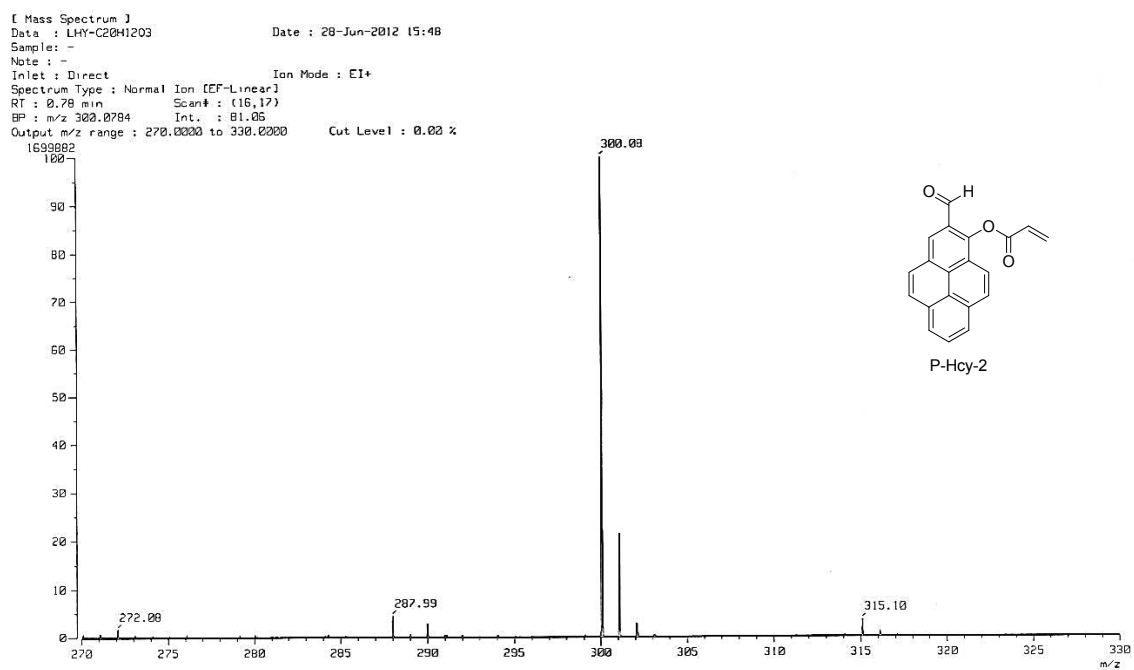

**Fig S6.** The FAB mass spectrum of **P-Hcy-2**.

**Table S1.** Detection limits, dissociation constants and response times of reported Hcy probes, **P-Hcy-1** and **P-Hcy-2**.

|                | Detection limit         | Dissociation constant (Kd)         | Response time |
|----------------|-------------------------|------------------------------------|---------------|
| <b>P-Hcy-1</b> | $1.94 \times 10^{-6}$ M |                                    | 10min         |
| <b>P-Hcy-2</b> | $1.44 \times 10^{-7}$ M |                                    | 5min          |
| Ref. 8(a)      |                         |                                    | 4min          |
| Ref. 8(b)      |                         | $3.23 (\pm 0.20) \times 10^{-4}$ M |               |
| Ref. 8(c)      | $4.5 \times 10^{-4}$ M  |                                    |               |
| Ref. 8(d)      |                         |                                    | 20min         |
| Ref. 8(e)      |                         | $6.05 (\pm 1.16) \times 10^{-4}$ M |               |
| Ref. 8(f)      | 42 nM                   |                                    | 10min         |



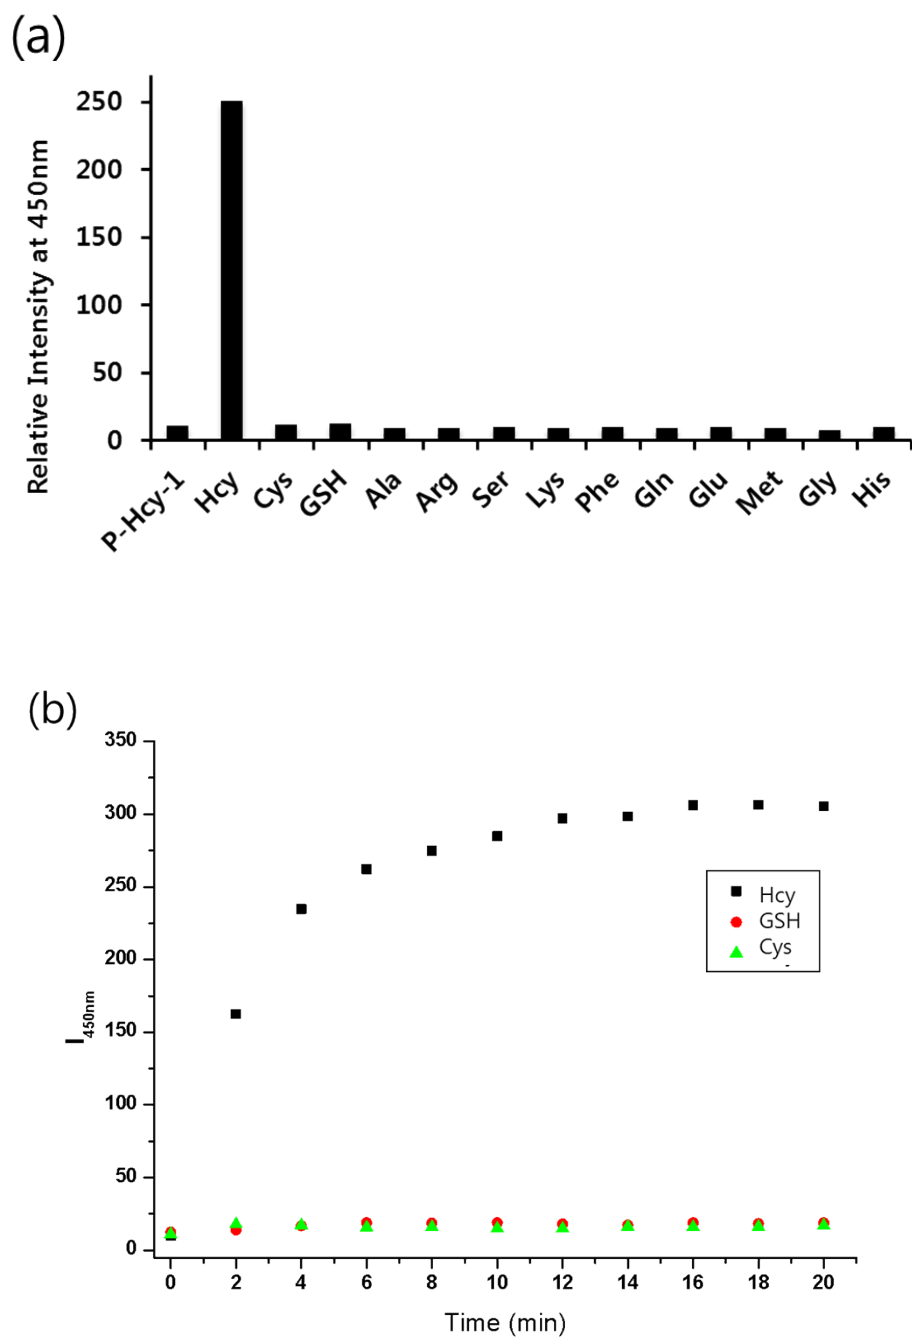

**Fig S7.** Selective response of **P-Hcy-1** to Hcy. (a) Relative fluorescence intensities of **P-Hcy-1** (10  $\mu$ M) upon addition of 10 equiv. of various amino acids or GSH in HEPES buffer at 450nm. (b) Time-dependent change of **P-Hcy-1** (10  $\mu$ M) with the addition of 10 equiv. of Hcy, Cys and GSH in HEPES (0.01M, pH 7.4) containing 10% DMSO (excitation wavelength: 350 nm).

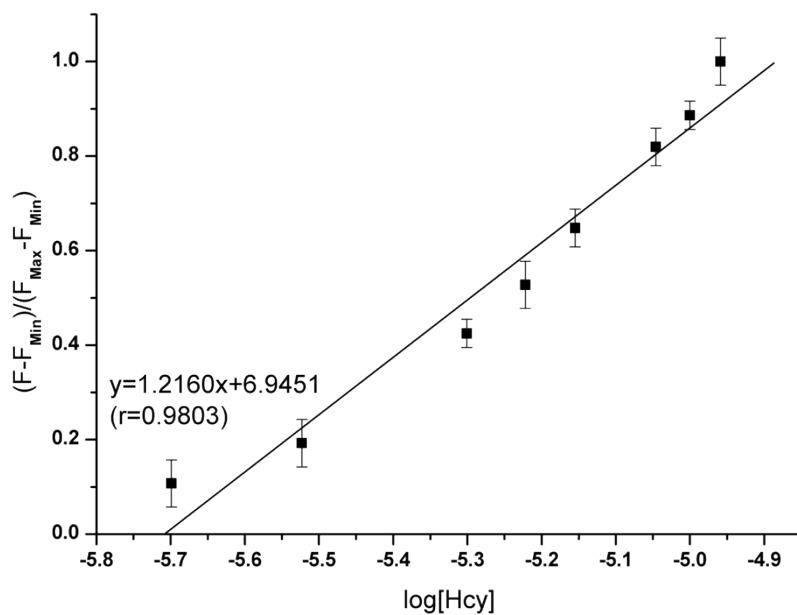

**Fig S8.** Normalized fluorescence responses of **P-Hcy-1** (1  $\mu\text{M}$ ) to changing Hcy concentrations in DMSO-HEPES (0.01M, pH 7.4) (1:9, v/v). (Detection limit =  $1.94 \times 10^{-6}$  M).

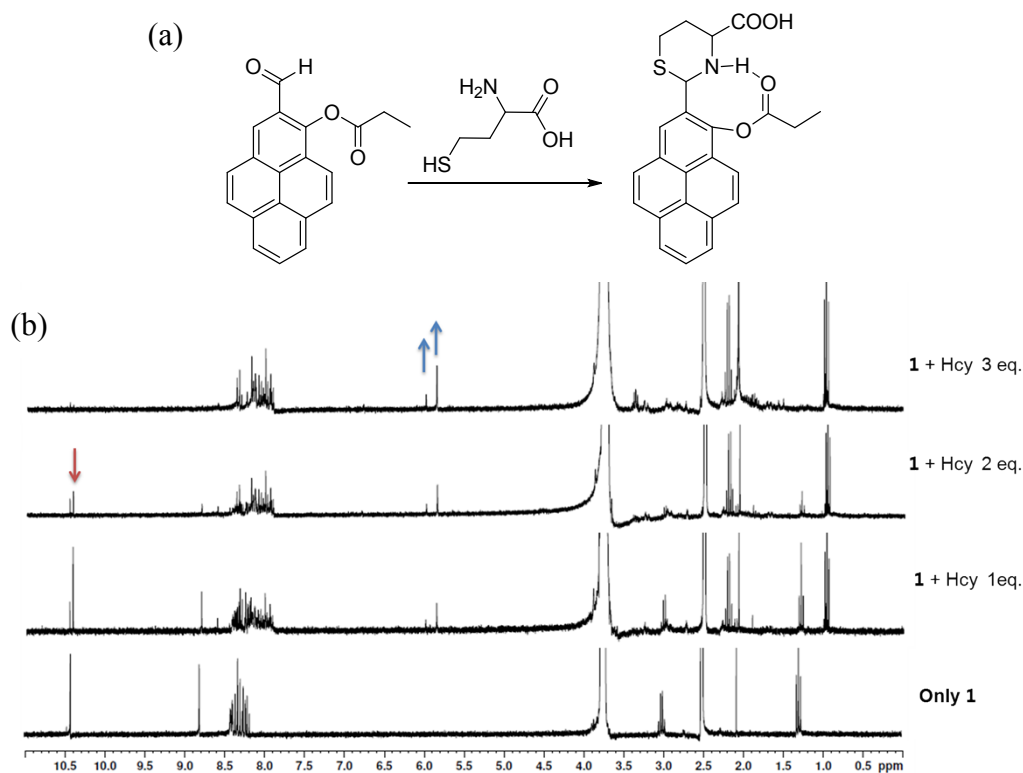

**Fig S9.** (a) Possible mechanism for the reaction between **P-Hcy-1** and Hcy. (b)  $^1\text{H}$  NMR R spectral change of **P-Hcy-1** upon addition of Hcy in DMSO- $d_6$ :D $_2$ O (9:1, v/v).

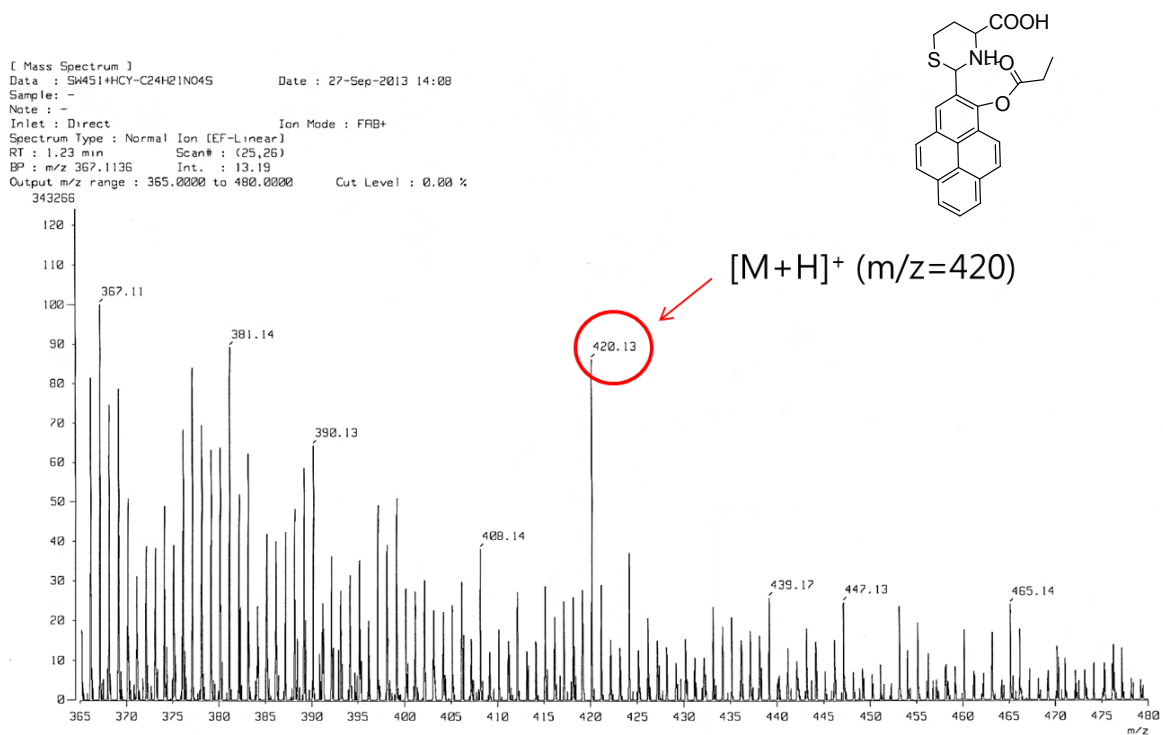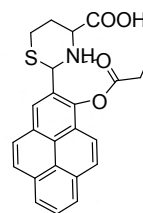

**Fig S10.** The FAB mass spectrum of **P-Hcy-1**+Hcy.

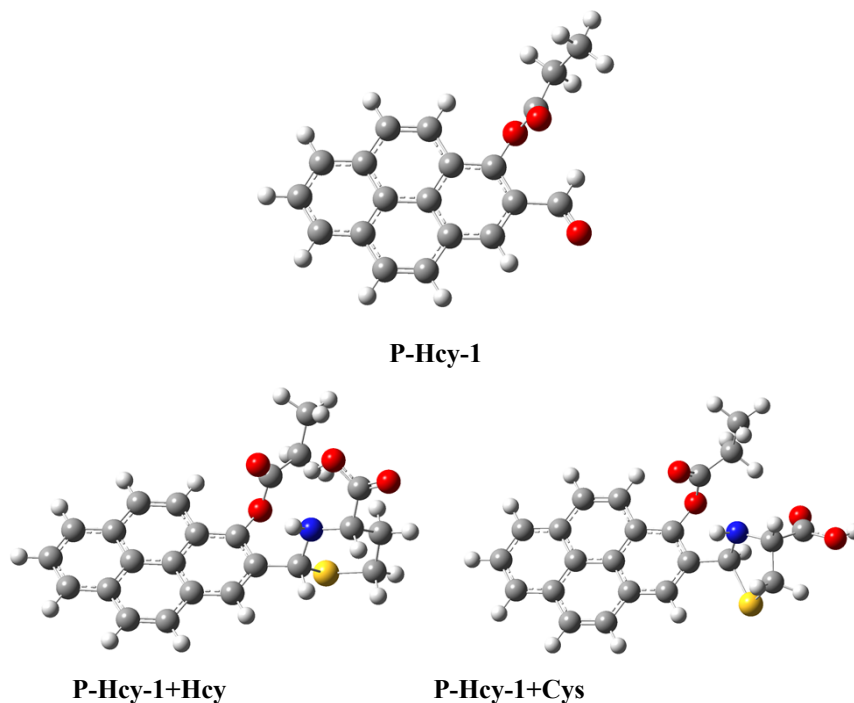

**Fig S11.** Optimized structures of **P-Hcy-1**, **P-Hcy-1+Hcy** and **P-Hcy-1+Cys**.

(a) **P-Hcy-1+Hcy**

| Excitation contribution  | Molecular orbital                                                                           |                                                                                               |
|--------------------------|---------------------------------------------------------------------------------------------|-----------------------------------------------------------------------------------------------|
| HOMO-1 → LUMO+1<br>4.0 % | 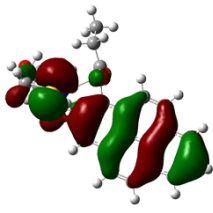<br>HOMO-1 | <br>LUMO+1 |
| HOMO → LUMO<br>96.0 %    | <br>HOMO   | <br>LUMO   |

**(b) P-Hcy-1+Cys**

| Excitation contribution   | Molecular orbital                                                                             |                                                                                                 |
|---------------------------|-----------------------------------------------------------------------------------------------|-------------------------------------------------------------------------------------------------|
| HOMO-1 → LUMO<br>3.8 %    | 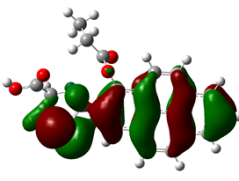<br>HOMO-1 | <br>LUMO   |
| HOMO-1 → LUMO +1<br>3.0 % | <br>HOMO-1 | <br>LUMO+1 |
| HOMO → LUMO<br>83.1 %     | <br>HOMO   | <br>LUMO   |
| HOMO → LUMO+1<br>10.1 %   | <br>HOMO   | <br>LUMO+1 |

**Fig S12.** Molecular orbitals and excitation contributions of the excitation for (a)**P-Hcy-1** +Hcy and (b) **P-Hcy-1**+Cys.

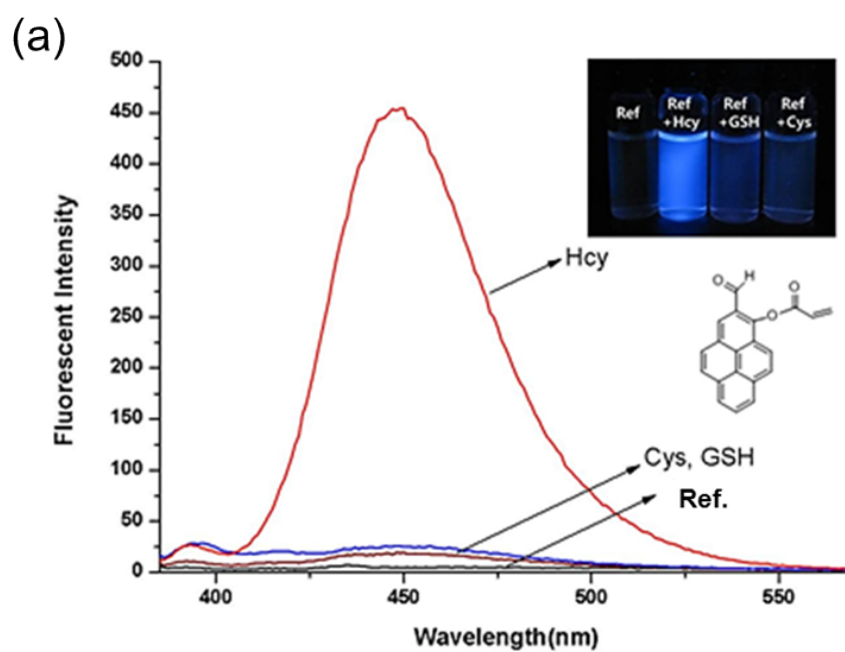

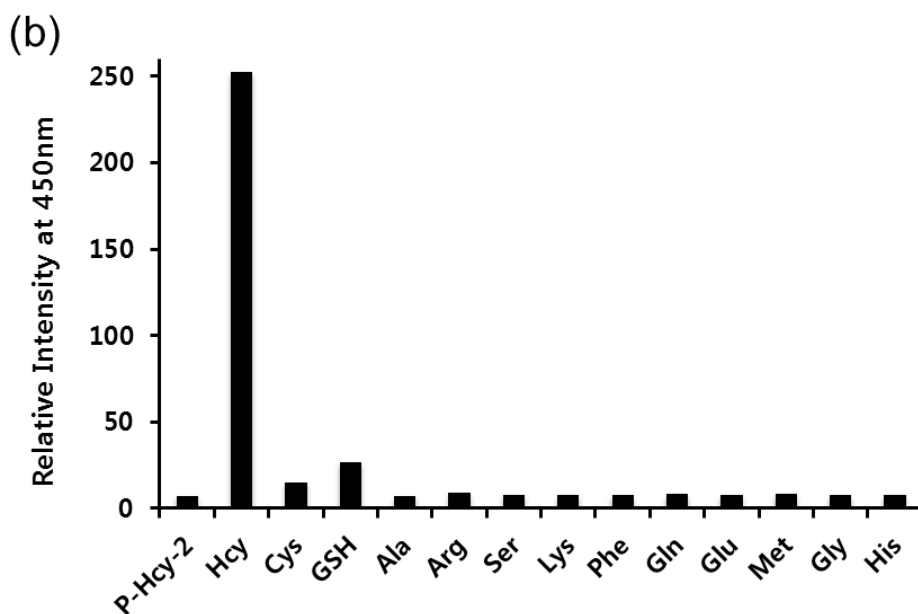

**Fig S13.** Selective response of **P-Hcy-2** to Hcy. (a) Fluorescence spectra of **P-Hcy-2** (10  $\mu$ M) in HEPES (0.01 M, pH 7.4) containing 10% DMSO upon addition of 10 equiv. of Hcy, Cys and GSH (excitation wavelength: 376 nm, slit:  $3 \times 5$  nm). Inset: an image of **P-Hcy-2** in the absence and presence of Hcy, Cys and GSH under a handheld UV lamp at 365 nm. (b) Relative fluorescence intensities of **P-Hcy-2** (10  $\mu$ M) upon addition of 10 equiv. of various amino acids or GSH in HEPES buffer at 450 nm.

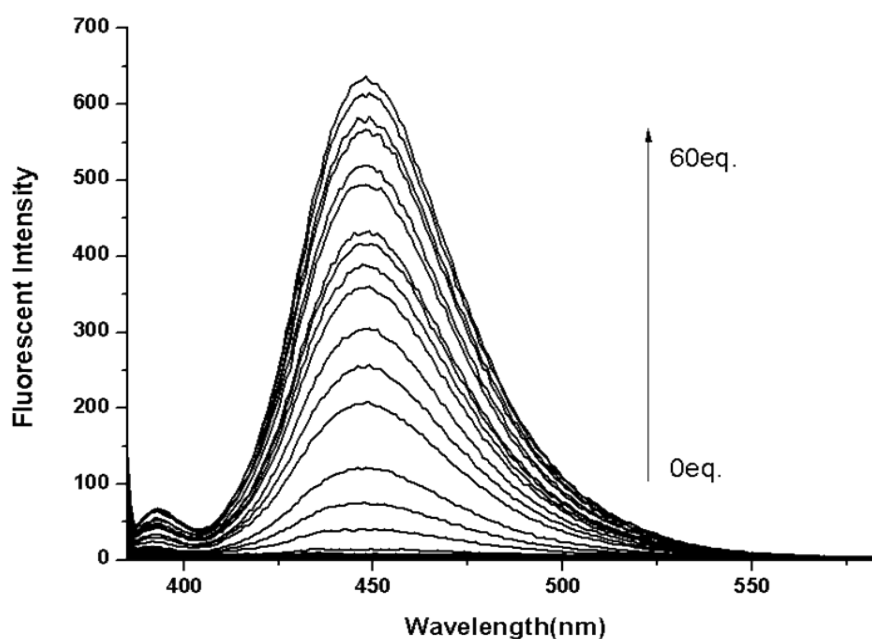

**Fig S14.** Fluorescence changes of **P-Hcy-2** (10  $\mu$ M) with Hcy in DMSO-HEPES (0.01M, pH 7.4) (1:9, v/v). (Excitation wavelength: 376 nm) (Slit: 3  $\times$  5 nm).

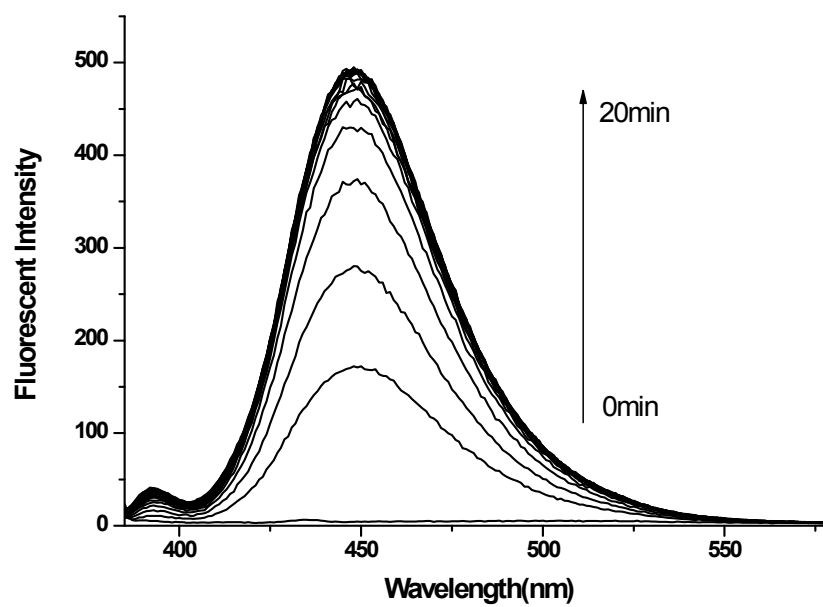

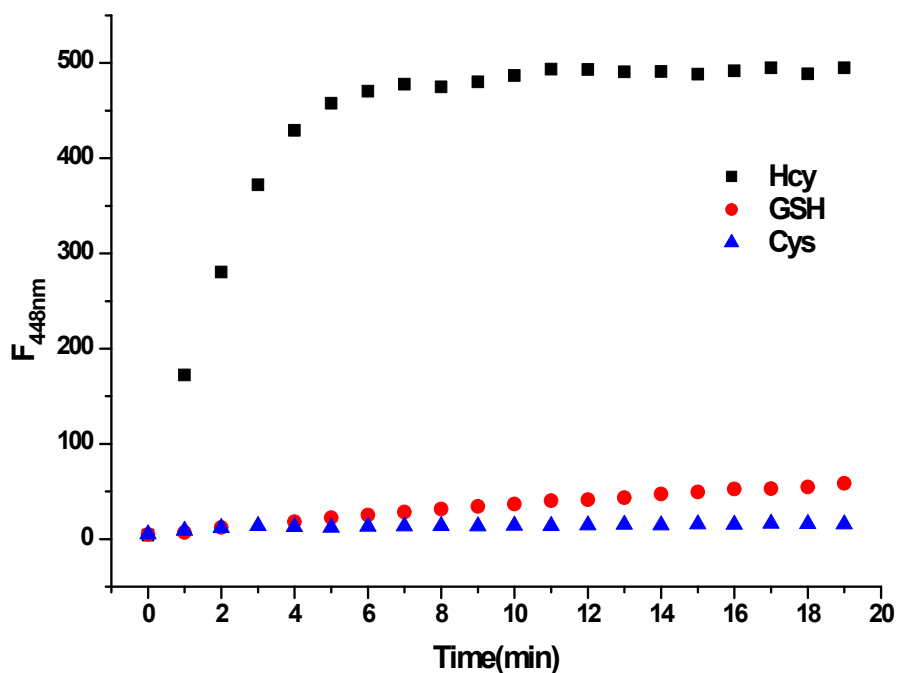

**Fig S15.** (a) Time-dependent change of **P-Hcy-2** (10  $\mu$ M) with the addition of 10 equiv. of Hcy in DMSO-HEPES (0.01M, pH 7.4) (1:9, v/v). (Excitation wavelength: 376 nm) (Slit:  $3 \times 5$  nm). (b) Time-dependent change of **P-Hcy-2** (10  $\mu$ M) with the addition of 10 equiv. of Hcy, Cys and GSH in DMSO-HEPES (0.01M, pH 7.4) (1:9, v/v). (Excitation wavelength: 376 nm) (Slit:  $3 \times 5$  nm).

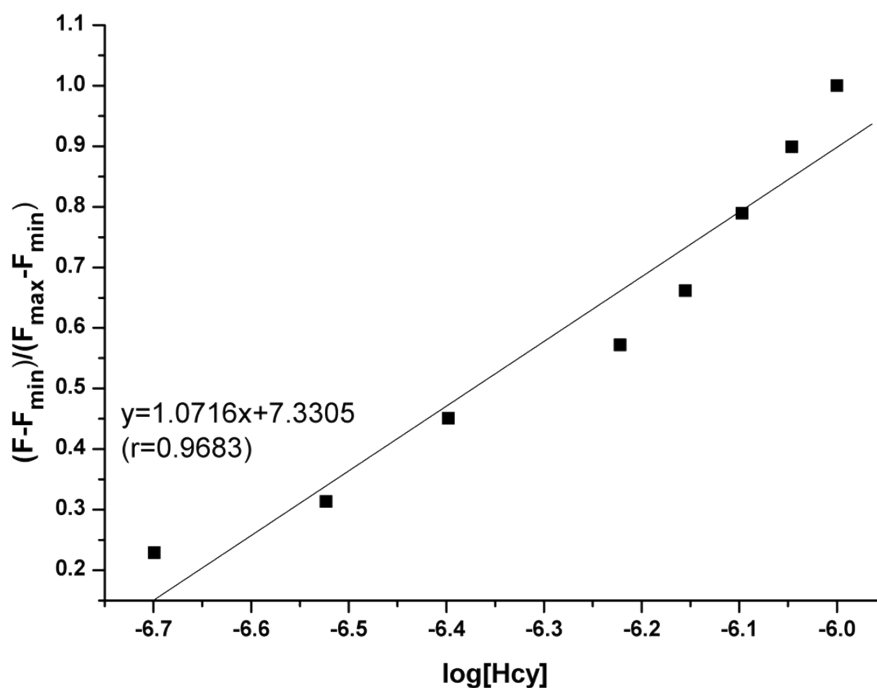



**Fig S16.** Normalized fluorescence responses of **P-Hcy-2** (0.1  $\mu\text{M}$ ) to changing Hcy concentrations in DMSO-HEPES (0.01M, pH 7.4) (1:9, v/v). (Detection limit =  $1.44 \times 10^{-7}$  M)

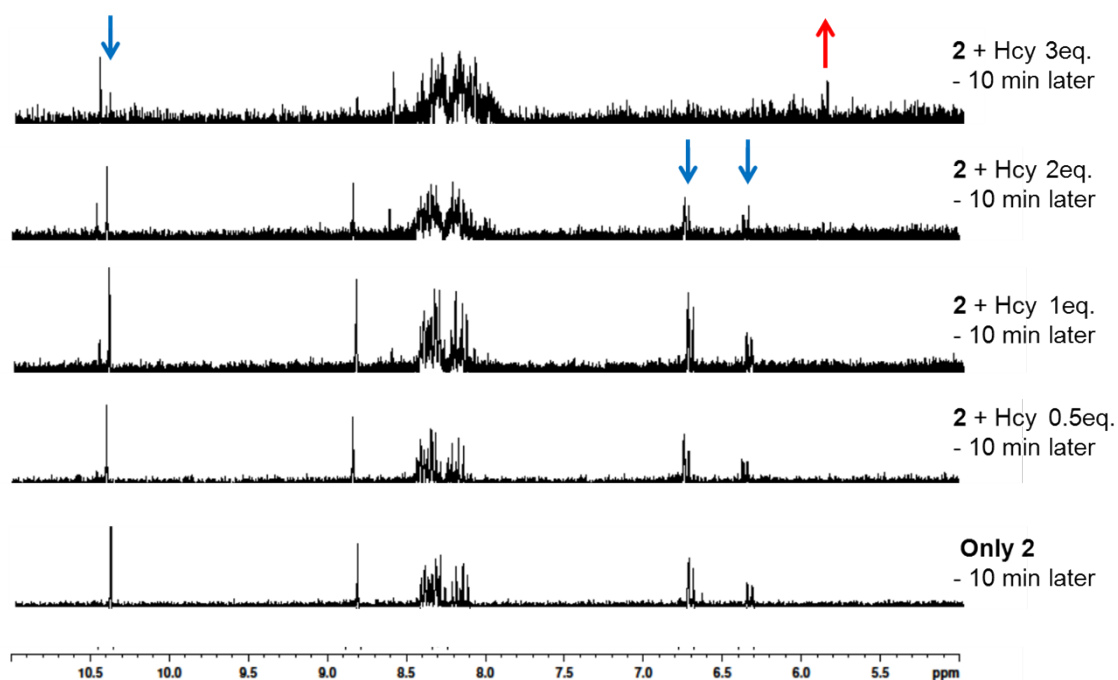

**Fig S17.**  $^1\text{H}$  NMR spectral change of **P-Hcy-2** upon addition of Hcy in DMSO- $d_6$ : $\text{D}_2\text{O}$  (9:1, v/v).

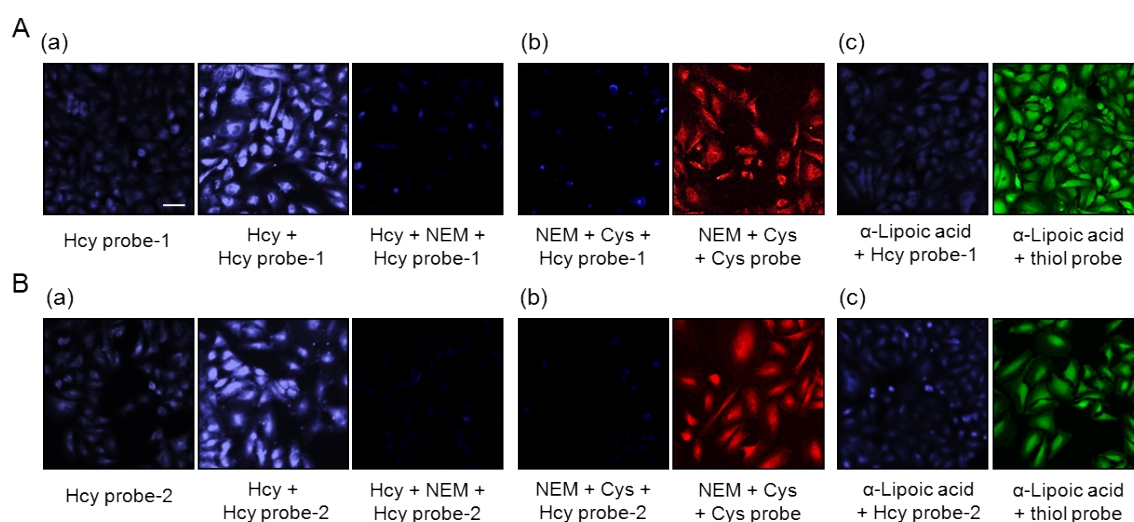

**Fig S18.** Fluorescence detection of Hcy in HeLa cells using (A) **P-Hcy-1** and (B) **P-Hcy-2**

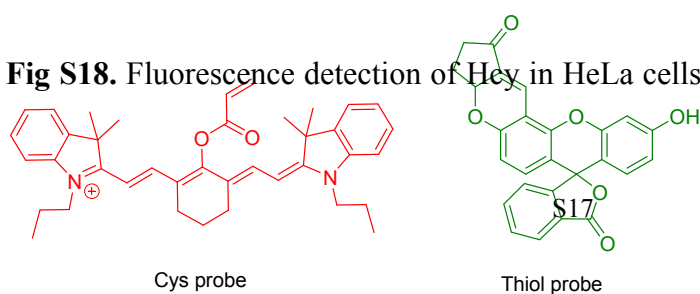

**y-2.** (a) Left; fluorescence image of cells incubated with 60  $\mu\text{M}$  Hcy probe for 20 min. Middle; fluorescence image of cells treated with 20  $\mu\text{M}$  Hcy for 30 min, followed by treatment with 60  $\mu\text{M}$  Hcy probe for 20 min. Right; fluorescence image of cells treated with 20  $\mu\text{M}$  Hcy for 30 min, incubated with 500  $\mu\text{M}$  NEM for 20 min to remove intracellular biothiols and then stained with 60  $\mu\text{M}$  Hcy probe for 20 min. (b) Fluorescence image of cells incubated with 500  $\mu\text{M}$  NEM for 20 min, supplemented with 20  $\mu\text{M}$  Cys for 20 min and then stained with either (left) 60  $\mu\text{M}$  Hcy probe or (right) 20  $\mu\text{M}$  Cys probe for 20 min. (c) Fluorescence image of cells incubated with 250  $\mu\text{M}$   $\alpha$ -lipoic acid for 48 h to enhance production of GSH in cells, followed by treatment with either (left) 60  $\mu\text{M}$  Hcy probe or (right) 20  $\mu\text{M}$  thiol probe for 20 min. Scale bar represents 50  $\mu\text{m}$ . (C) Structure of Cys and thiol probes used for this study.
